# Supplementary material for: Co(ii)Tetraphenyltetraphenanthroporphyrin@MWCNTs: enhanced π–π interaction for robust electrochemical catalysis
Source: Royal Society of Chemistry journal article supplement (doi:10.1039/c9nj01707k), 2019-01-01
Supplement: c9nj01707k1.pdf [file c9nj01707k1.pdf]

*Supporting Information*

**Co(II)Tetraphenyltetraphenanthroporphyrin@MWCNTs: Enhanced  $\pi\pi$  Interaction for Robust Electrochemical Catalysis**

Tingting Gu<sup>a</sup>, Jiayu Tao<sup>b</sup>, Weihua Zhu<sup>a,c,\*</sup>, John Mack<sup>d,\*</sup>, Rodah C. Soy<sup>d</sup>, Tebello Nyokong<sup>d</sup>, Haijun Xu<sup>b,\*</sup>, Minzhi Li<sup>a</sup>, and Xu Liang<sup>a,c,\*</sup>

<sup>a</sup> School of Chemistry and Chemical Engineering, Jiangsu University, Zhenjiang 212013, PR China

<sup>b</sup> College of Chemical Engineering, Jiangsu Key Lab of Biomass-based Green Fuels and Chemicals, Nanjing Forestry University, Nanjing 210037, PR China

<sup>c</sup> State Key Laboratory of Coordination Chemistry, Nanjing University, Nanjing 210000, PR China

<sup>d</sup> Centre for Nanotechnology Innovation, Department of Chemistry, Rhodes University, Makhanda 6140, South Africa

Corresponding authors: Prof. Xu Liang, E-mail: [liangxu@ujs.edu.cn](mailto:liangxu@ujs.edu.cn), Tel: +86-511-8879-1928; Prof. Dr. Weihua Zhu, E-mail: [sayman@ujs.edu.cn](mailto:sayman@ujs.edu.cn), Tel: +86-511-8879-1928; Prof. Dr. Haijun Xu, E-mail: [xuhaijun@njfu.edu.cn](mailto:xuhaijun@njfu.edu.cn). Dr. John Mack, E-mail: [j.mack@ru.ac.za](mailto:j.mack@ru.ac.za).

t-Bu-Phenan-Por\_150703102821 #20 RT: 0.25 AV: 1 NL: 4.21E5  
T: FTMS + p ESI Full ms [1002.00-1660.00]

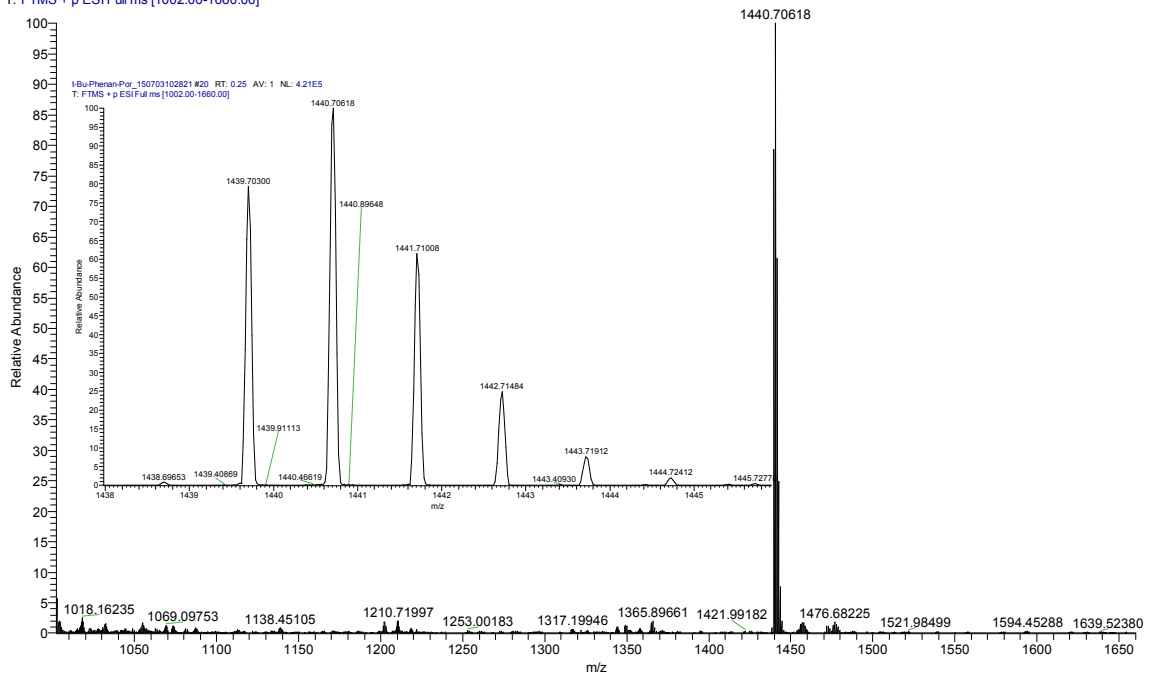

Figure S1 High-resolution mass spectra of H<sub>2</sub>TPTP 1.

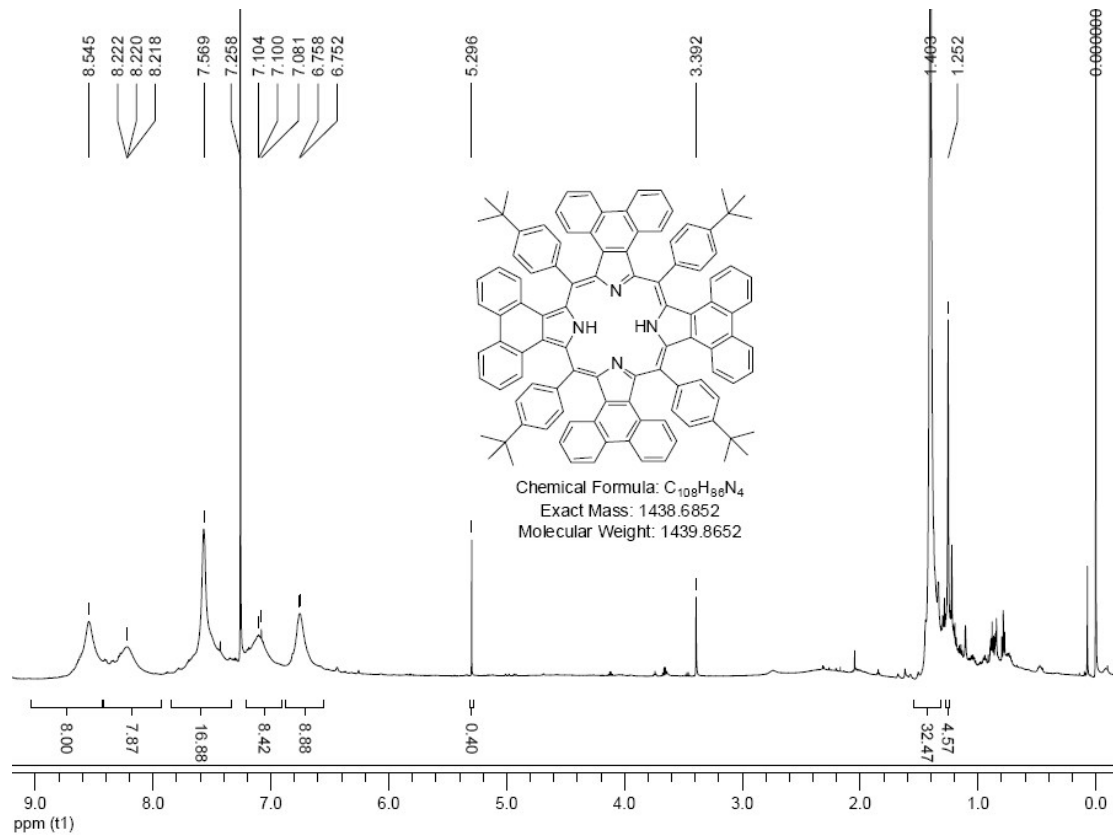

Figure S2 <sup>1</sup>H NMR spectra of H<sub>2</sub>TPTP 1.

CO-1495\_190516093958 #50-58 RT: 0.39-0.45 AV: 9 NL: 9.15E4  
T: FTMS + p ESI Full ms [1000.00-2000.00]

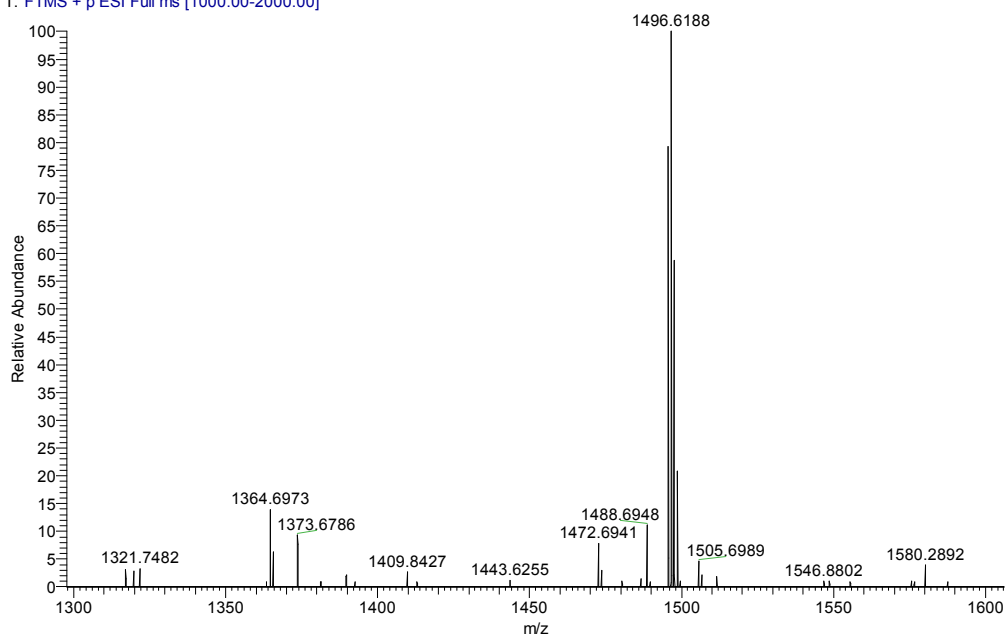

CO-1495\_190516093958 #50-58 RT: 0.39-0.45 AV: 9 NL: 9.15E4  
T: FTMS + p ESI Full ms [1000.00-2000.00]

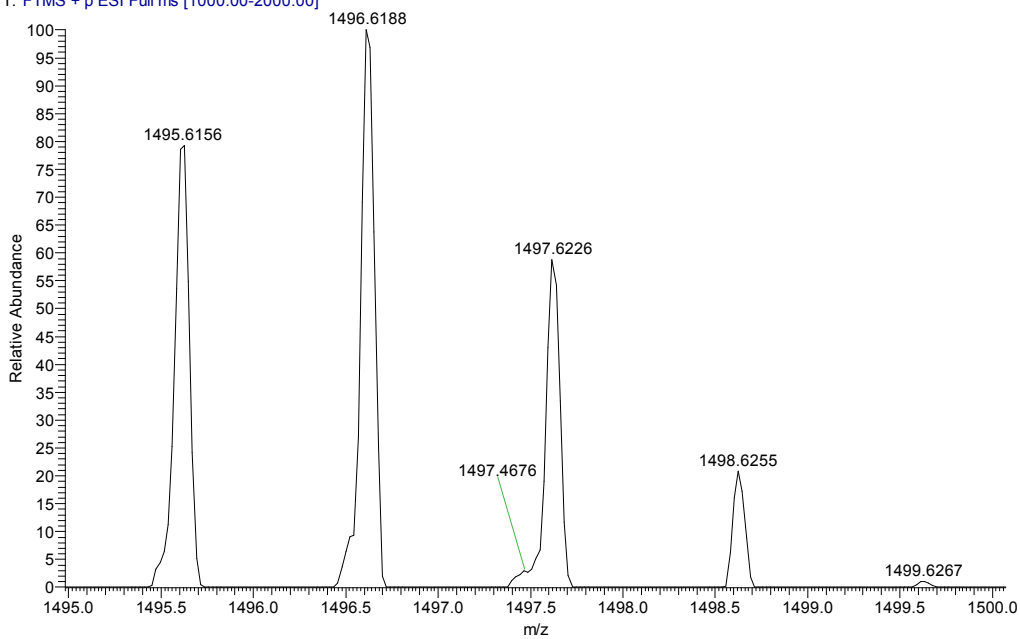

Figure S3 High-resolution mass spectra of Co(II)TPTPP 2.

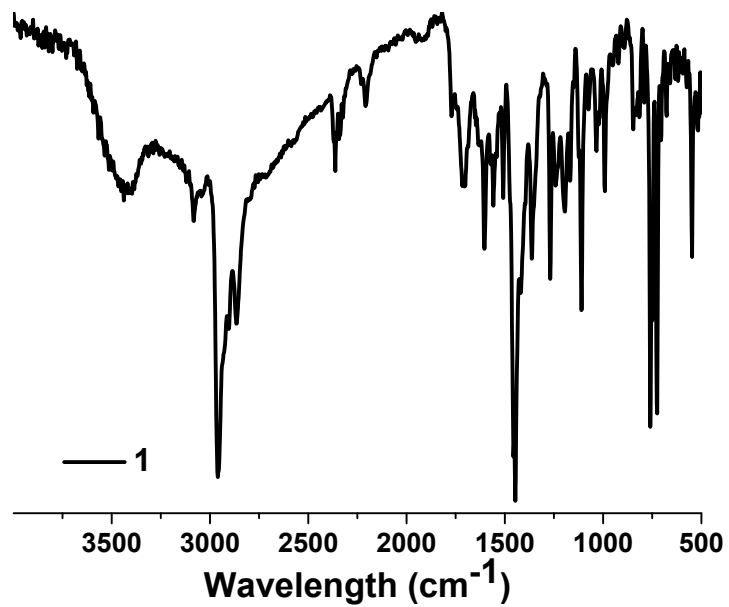

Figure S4 FT-IR spectra H<sub>2</sub>TPTTP 1,

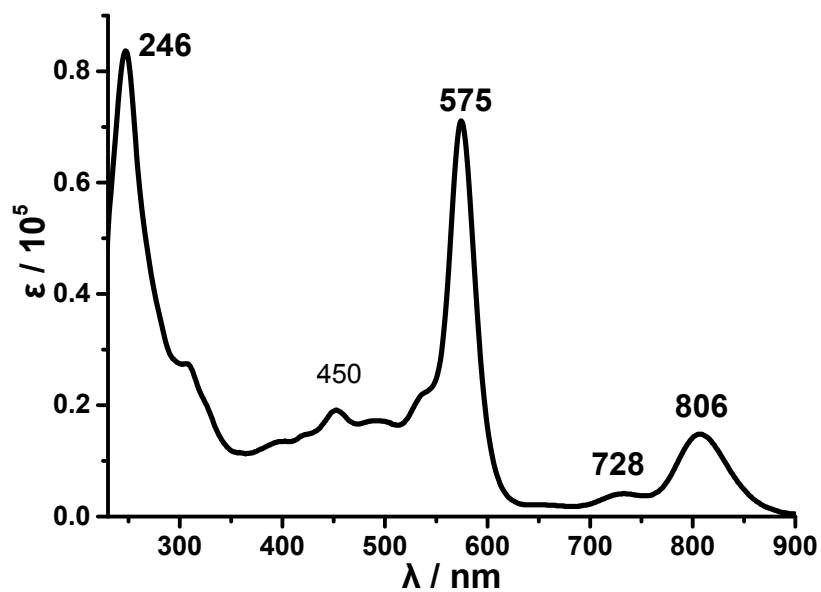

Figure S5 UV-vis absorption spectra H<sub>2</sub>TPTPP 1

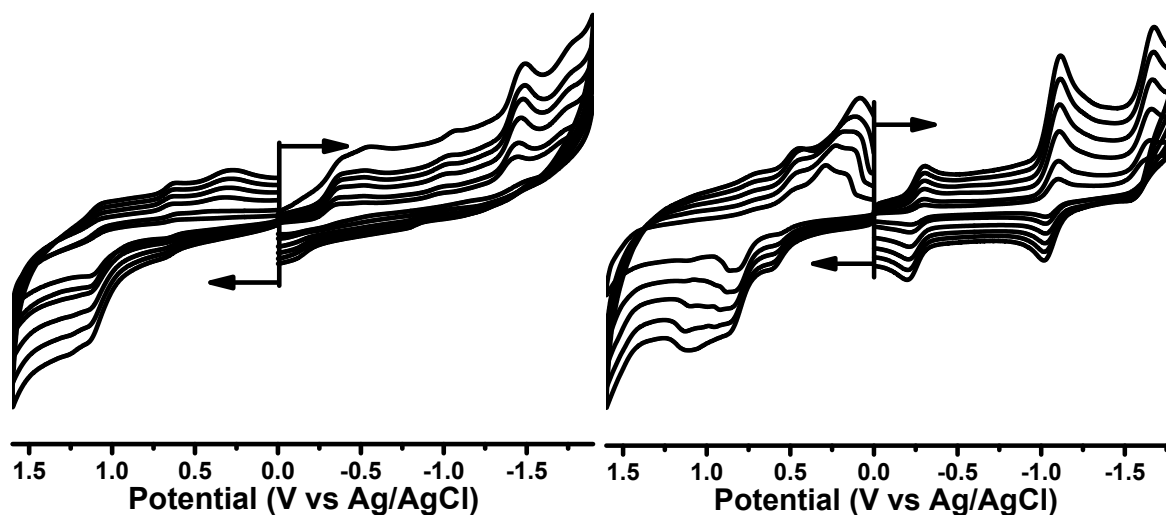

Figure S6 Cyclic voltammetry of H<sub>2</sub>TPTPP 1 (left) and Co(II)TPTPP 2 (right) at scan speed  $\nu = 50$  mV/s, 100 mV/s, 200 mV/s, 300 mV/s, 400 mV/s, 500 mV/s in CH<sub>2</sub>Cl<sub>2</sub> containing 0.1M TBAP.

**Table S1:** The calculated TD-DFT spectra of B3LYP optimized geometry for the methyl-substituted model complexes of Co(II)TPP and Co(II)TPTPP **2** obtained using Gaussian 09 software package using the B3LYP functional with 6-31G(d) basis set.

| Co(II)TPP            |                |                   |      |        |                  |      |                                                                                         |
|----------------------|----------------|-------------------|------|--------|------------------|------|-----------------------------------------------------------------------------------------|
| Band <sup>a</sup>    | # <sup>b</sup> | Calc <sup>c</sup> |      |        | Exp <sup>d</sup> |      | Wave Function <sup>e</sup> =                                                            |
| ----                 | <b>1</b>       | ----              | ---- | ----   | ----             | ---- | Ground State                                                                            |
| <b>Q</b>             | <b>13, 14</b>  | 19.2              | 520  | (0.01) | 18.9             | 529  | <b>56% s</b> → -a/-s; <b>43% a</b> → -a/-s; ...                                         |
| <b>B</b>             | <b>28, 29</b>  | 25.7              | 388  | (0.49) | 24.3             | 412  | 44% d <sub>yy</sub> → -a/-s; <b>22% a</b> → -a/-s; <b>22% s</b> → -a/-s; ...            |
| Co(II)TPTPP          |                |                   |      |        |                  |      |                                                                                         |
| Band <sup>a</sup>    | # <sup>b</sup> | Calc <sup>c</sup> |      |        | Exp <sup>d</sup> |      | Wave Function <sup>e</sup> =                                                            |
| ----                 | <b>1</b>       | ----              | ---- | ----   | ----             | ---- | Ground State                                                                            |
| <b>Q<sub>x</sub></b> | <b>13</b>      | 14.9              | 671  | (0.00) | 14.7             | 680  | <b>56% s</b> → -a/-s; <b>41% a</b> → -a/-s; ...                                         |
| <b>Q<sub>y</sub></b> | <b>14</b>      | 15.2              | 658  | (0.00) |                  |      | <b>52% a</b> → -a/-s; <b>44% s</b> → -a/-s; ...                                         |
| <b>B<sub>x</sub></b> | <b>21</b>      | 18.5              | 541  | (0.48) | 19.2             | 521  | <b>47% a</b> → -a/-s; <b>33% s</b> → -a/-s; ...                                         |
| <b>B<sub>y</sub></b> | <b>25</b>      | 19.2              | 520  | (0.65) |                  |      | <b>46% s</b> → -a/-s; <b>34% a</b> → -a/-s; 12% d <sub>z<sup>2</sup></sub> → -a/-s; ... |

<sup>a</sup> – Band assignment described in the text. <sup>b</sup> – The number of the state assigned in terms of ascending energy within the TD-DFT calculation. <sup>c</sup> – Calculated band energies (10<sup>3</sup>.cm<sup>-1</sup>), wavelengths (nm) and oscillator strengths in parentheses (f). <sup>d</sup> – Observed energies (10<sup>3</sup>.cm<sup>-1</sup>) and wavelengths (nm) in CH<sub>2</sub>Cl<sub>2</sub> for Co(II)TPP and **2**. <sup>e</sup> – The wave functions based on the eigenvectors predicted by TD-DFT. One-electron transitions associated with the **a**, **s**, **-a** and **-s** MOs of Michl's perimeter model<sup>[21]</sup> are highlighted in bold.

## References

1. S. B. Piepho and P. N. Schatz, In *Group Theory in Spectroscopy with Applications to Magnetic Circular Dichroism*, Wiley: New York, 1983.
2. Gaussian 09, Revision E.01, M. J. Frisch, G. W. Trucks, H. B. Schlegel, G. E. Scuseria, M. A. Robb, J. R. Cheeseman, G. Scalmani, V. Barone, G. A. Petersson, H. Nakatsuji, X. Li, M. Caricato, A. Marenich, J. Bloino, B. G. Janesko, R. Gomperts, B. Mennucci, H. P. Hratchian, J. V. Ortiz, A. F. Izmaylov, J. L. Sonnenberg, D. Williams-Young, F. Ding, F. Lipparini, F. Egidi, J. Goings, B. Peng, A. Petrone, T. Henderson, D. Ranasinghe, V. G. Zakrzewski, J. Gao, N. Rega, G. Zheng, W. Liang, M. Hada, M. Ehara, K. Toyota, R. Fukuda, J. Hasegawa, M. Ishida, T. Nakajima, Y. Honda, O. Kitao, H. Nakai, T. Vreven, K. Throssell, J. A. Montgomery, Jr., J. E. Peralta, F. Ogliaro, M. Bearpark, J. J. Heyd, E. Brothers, K. N. Kudin, V. N. Staroverov, T. Keith, R. Kobayashi, J. Normand, K. Raghavachari, A. Rendell, J. C. Burant, S. S. Iyengar, J. Tomasi, M. Cossi, J. M. Millam, M. Klene, C. Adamo, R. Cammi, J. W. Ochterski, R. L. Martin, K. Morokuma, O. Farkas, J. B. Foresman, and D. J. Fox, Gaussian, Inc., Wallingford CT, 2016.
